# Supplementary material
Source: publisher site journal article supplement (https://www.dovepress.com/article/226379)
Supplement: Supplementary file 1 [file get_supplementary_file.php]

**Annex 1. Search strategy of PubMed**

#1 access [title/ Abstract]

#2 accessibility [title/ Abstract]

#3 #1 OR #2

#4 novel [title/ Abstract]

#5 new [title/ Abstract]

#6 innovative [title/ Abstract]

#7 breakthrough [title/ Abstract]

#8 #4 OR #5 OR #6 OR #7

#9 medicines [title/ Abstract]

#10 drug [title/ Abstract]

#11 pharmaceutical [title/ Abstract]

#12 therapy [title/ Abstract]

#13 medication [title/ Abstract]

#14 #9 OR #10 OR #11 OR #12 OR #13

#15 China [title/ Abstract]

#16 Chinese [title/ Abstract]

#17 #15 OR #16

#18 #3 AND #8 AND #14 AND #17

**Chinese terms of the above key words**

Access/accessibility：可及/可及性

novel/new/innovative/breakthrough:创新/新/突破性

medicines/drug/pharmaceutical/therapy/medication：药/药品/药物/药物治疗

China/Chinese：中国

**Annex 2. Details of the key informant interview**

**Designer and facilitator of the interview:**

Jing SUN

**Interviewers:**

Ms Jing SUN, PhD, Associate Professor of Pharmaceutical Policy

Mr Yifan DIAO, PhD candidate of Pharmaco-epidemiology

Ms Mingshuang LI, MSc student of Public Health

Mr Zhiran Huang, MSc, Assistant Researcher of Pharmaceutical Policy Analysis

All interviewers are from School of Public Health, Chinese Academy of Medical Sciences & Peking Union Medical College (CAMS & PUMC)

**Relationship of interviewers with participants:**

Prior to study commencement, there was no relationship established between the interviewers and the participants.

**Participant knowledge of the interviewers:**

The participants do not know the researchers and the interviewers personally, but they know school of Public Health, CAMS & PUMC quite well. All interviewees were briefed about the reasons for doing this research and the researchers of the study, and provided with written outline of key informant interview.

**Interviewer characteristics:**

All interviewers and facilitator have no conflict of interests, and are voluntarily to be part of the research group.

**List of interviewed government agencies and pharmaceutical companies:**

1. Center of Drug Evaluation (CDE), National Medical Products Administration (NMPA), in charging of new drug evaluation and market authorization;
2. Department of Pharmaceutical Policy and Essential Medicines System, National Health Commission (NHC), in charging of setting national pharmaceutical policy;
3. Department of Medicines Pricing and Procurement, National Healthcare Security Administration (NHSA), in charging of price negotiation with new drug suppliers, insurance benefit package setting, national pooled procurement;
4. Department of Consumer Products Industry, Ministry of Industry and Information Technology (MIIT), in charging of pharmaceutical industry development;
5. Zhejiang Provincial Healthcare Security Administration, in charging of price negotiation with new drug suppliers, insurance benefit package setting in Zhejiang province;
6. Hangzhou Municipal Healthcare Security Administration, in charging of insurance benefit package setting in Hangzhou city;
7. Department of Pharmacy, West China Hospital, Sichuan University, to understand the practical problems of procurement and clinical use of newly covered novel medicines by health insurance;
8. Drugs for Neglected Diseases initiative (DNDi), to understand the problems of new drug developers faced in China, and their insights about the changing policy environment in terms of R&D promotion and timely market authorization.
9. IQVIA (IMS and Quintiles) Institute China, to understand the methodologies used by IQVIA Chinese Hospital Pharmaceutical Audit (CHPA) system for collection and calculation of the consumption data.
10. Shanghai Roche Pharmaceuticals Ltd., to understand its patient assistance program, the problems of new drug registration in China, and their insights about the changing policy environment in terms of timely market authorization, insurance coverage, procurement policies and regulation of prescriptions in hospitals, from the perspective of international R&D based pharmaceutical company.
11. Ascletis Pharma Inc., to understand the problems of new drug registration in China, and their insights about the changing policy environment in terms of timely market authorization, insurance coverage, procurement policies and regulation of prescriptions in hospitals, from the perspective of local R&D based pharmaceutical company.

**How participants selected:**

The interviewees were selected purposively, based on the potential barriers of access to novel medicines in China, and its respective responsible government agencies. Both local and multinational pharmaceutical companies, local and international pharmaceutical R&D research institutes, and a representative of public tertiary hospital were identified to conduct the interview, in order to understand specific barriers, degree of the effect of each barrier, and government efforts to address respective barriers, from the perspective of policy makers, pharmaceutical industry, research institutes, and hospitals, users of medicines.

**Method of approach to the interviewees:**

Face to face and telephone communications were used to conduct the interview. The interviewers are responsible to take notes during interview, no audio or visual recording were made. The background, objective and research questions of the study were provided to each of the interviewees one day before communications. Repeated tele-communications were made for confirming the facts, data and references in process of manuscript writing, for comments and corrections of the potential conclusions, and to check if major themes were clearly presented in the findings of the manuscript, The duration of the interviews generally took half an hour.

**Presence of non-participants:**

No other people presented besides the participants and researchers during face to face communication and telephone interview.

**Outline of the key informant interview:**

**Background**

China’s healthcare reform aims to provide affordable and equitable basic healthcare for all by 2020. Access to medicines is an essential part of the healthcare. The efforts of promoting access to medicines have been moving from meeting the needs of the basic healthcare, towards increasingly dedicated resources to offer breakthrough therapies.

**Objective**

To make a comprehensive review of barriers of access to novel medicines in China, and to understand how these barriers have been gradually unblocked.

**Research questions**

1. What was the status of access to novel medicines in China before 2015, when the State Council pushed the reform of new drug review and approval and the reduction of financial burden of life-saving novel medicines to individual?
2. What were the key barriers of access to novel medicines in terms of timely regulatory market authorization, affordability to individuals and the society, balancing the intellectual property right protection and R&D, supply & procurement policy, financing of public hospitals, and regulation of prescription in China?

3. What are the key efforts of the government to address the above barriers respectively, and how these efforts changed the situation of access to novel medicines in China?
